## Table of Contents

|                                                                                   |     |
|-----------------------------------------------------------------------------------|-----|
| <i>Preface</i> .....                                                              | vii |
| <i>Introduction</i> .....                                                         | 1   |
| I. Prolegomena: Discourse on Method.....                                          | 7   |
| § 1 Point of View: Derrida on Death and Difference . . . .                        | 9   |
| § 2 Descartes on Method and Rationality .....                                     | 15  |
| § 3 The Hegelian Method of Conceptual <i>Aufhebung</i> . . .                      | 19  |
| § 4 Kierkegaard's Doubt .....                                                     | 23  |
| § 5 Unstable Signs: Derrida Detects Traces of Death in<br>Hegel's Semiology ..... | 29  |
| § 6 The Rigor of Deconstruction: Two Texts and the<br>Space In-Between .....      | 38  |
| § 7 Parallelogram: Kierkegaard # Derrida .....                                    | 44  |
| II. Secrets of the Self: Derrida on Madness, Death, and God                       | 51  |
| § 8 Foucault on Madness, Cogito, and the History of<br>the Self .....             | 54  |
| § 9 Splitting up the Cartesian Self from Within .....                             | 57  |
| § 10 Aporias of Death.....                                                        | 66  |
| § 11 <i>Khôra</i> .....                                                           | 71  |
| § 12 Philosophical Apocalypse .....                                               | 76  |
| § 13 The Two Sources: Faith and Knowledge .....                                   | 80  |
| § 14 Secrets of the Self and of the Other .....                                   | 83  |
| III. Seven Perspectives on Death .....                                            | 89  |
| § 15 The Appropriation of Death as Problem and Aporia                             | 91  |
| § 16 Death and Ontology: Kierkegaard vs. Heidegger . . .                          | 99  |

|      |                                                                                  |     |
|------|----------------------------------------------------------------------------------|-----|
| § 17 | Violence and the Death of the Other: Levinas, Kierkegaard, and Derrida . . . . . | 107 |
| § 18 | The Terror of Sacrifice: Abraham in Late Modernity . . . . .                     | 115 |
| § 19 | Death, Love, and the Foundations of Ethics . . . . .                             | 119 |
| § 20 | Disturbing Enigma: Levinas and Kierkegaard on the Other Side of Truth . . . . .  | 125 |
| § 21 | Autopsy . . . . .                                                                | 131 |
| IV.  | Alterity and Autopsia . . . . .                                                  | 135 |
| § 22 | The Genre Conflict Between Psychology and Edification . . . . .                  | 138 |
| § 23 | Lazarus and the Platonic Cave . . . . .                                          | 151 |
| § 24 | A.A: The Synthesis of the Self . . . . .                                         | 155 |
| § 25 | The Rupture in the Spirit . . . . .                                              | 162 |
| § 26 | Self-Contradictions . . . . .                                                    | 168 |
| § 27 | In the Name . . . . .                                                            | 179 |
| § 28 | X . . . . .                                                                      | 186 |
| V.   | Dialectics of Darkness . . . . .                                                 | 191 |
| § 29 | Double Dialectics of Despair . . . . .                                           | 192 |
| § 30 | The Rhetorical Abyss of a “Sickness unto Death” . . . . .                        | 199 |
| § 31 | Despair, Causality, Responsibility, and Origin . . . . .                         | 205 |
| § 32 | The Hypothesis “God” . . . . .                                                   | 208 |
| § 33 | Doubt and Despair . . . . .                                                      | 212 |
| § 34 | An Excess of Possibility . . . . .                                               | 219 |
| § 35 | The Closure and Repetition of Metaphysics . . . . .                              | 230 |
| VI.  | The Thanatology of the Spirit . . . . .                                          | 241 |
| § 36 | For or Against Hegel . . . . .                                                   | 244 |
| § 37 | The Eternal Self and the Difference of Despair . . . . .                         | 252 |
| § 38 | Eternity Revisited . . . . .                                                     | 259 |
| § 39 | Hypotheses . . . . .                                                             | 266 |
| § 40 | Phänomenologie des Geistestodes (Demonic Double Game) . . . . .                  | 272 |

|                                                                            |     |
|----------------------------------------------------------------------------|-----|
| § 41 A Cross for the Speculation.....                                      | 277 |
| § 42 Alteropsia.....                                                       | 291 |
| VII. Hidden Ground: Holy Ground.....                                       | 295 |
| § 43 Kierkegaard: The Hidden God.....                                      | 298 |
| § 44 Derrida: I Call Myself God.....                                       | 304 |
| § 45 Sin, Aporia, and Revelation in The Sickness unto<br>Death.....        | 311 |
| § 46 Derrida vs. Kierkegaard on Sovereignty and<br>Unconditional Gift..... | 318 |
| § 47 Derrida on Religion Without Religion.....                             | 322 |
| § 48 Kierkegaard on the Abyss and the Source.....                          | 328 |
| § 49 Metaphysics Revisited.....                                            | 331 |
| In the Final Analysis.....                                                 | 337 |
| <i>Abbreviations</i> .....                                                 | 341 |
| <i>Bibliography</i> .....                                                  | 343 |
| <i>Index of Names and Subjects</i> .....                                   | 355 |
